# Supplementary material for: Tuft Cells Increase Following Ovine Intestinal Parasite Infections and Define Evolutionarily Conserved and Divergent Responses
Source: PubMed Central journal article supplement (PMC8646091; doi:10.3389/fimmu.2021.781108), 2021-11-22
Supplement: DataSheet_1.pdf [file DataSheet_1.pdf]

**Supplementary Table 1.** Summary of sheep infection experiments

| Experiment | Infection                                            | No. of sheep sampled                                             | Timepoint of tissue collection |
|------------|------------------------------------------------------|------------------------------------------------------------------|--------------------------------|
| IHC        | Oral bolus of 50,000<br>L3 of <i>T. circumcincta</i> | 18 infected<br>6 naïve<br>Suffolk-cross<br>12 months old<br>male | 5, 10, 21 dpi                  |
| IHC        | Oral bolus of 10,000<br>L3 of <i>H. contortus</i>    | 6 infected<br>3 naïve<br>Suffolk-cross<br>11 months old<br>male  | 55 dpi                         |
| scRNA-seq  | Oral bolus of 50,000<br>L3 of <i>T. circumcincta</i> | 2 infected<br>Texel-cross<br>6 month old<br>male                 | 21 dpi                         |

IHC = immunohistochemistry; dpi = day post-infection

**Supplementary Table 2.** Details of antibodies used for immunohistochemistry

| Target                                          | Host and antibody type | Source                                                                | Dilution                     |
|-------------------------------------------------|------------------------|-----------------------------------------------------------------------|------------------------------|
| POU2F3                                          | Rabbit pAb             | Sigma-Aldrich, HPA019652                                              | 1:200 IF<br>1:500 IHC        |
| GFI1B                                           | Mouse mAb              | Santa Cruz Biotechnology,<br>Clone B-7, Sc-288356                     | 1:100                        |
| DCLK-1                                          | Rabbit pAb             | Abcam, ab31704                                                        | 1:50 – 1:2000                |
| TRPM5                                           | Rabbit pAb             | Aviva Systems Biology,<br>ARP35242_P050                               | 1:200                        |
| Villin                                          | Mouse mAb              | Chemicon International,<br>MAB1671                                    | 1:200                        |
| IgG pAb control                                 | Rabbit pAb             | Sigma-Aldrich, I5006                                                  | Matched to<br>conc. of 1y Ab |
| IgG2 <sub>b</sub> mAb<br>control                | Mouse mAb              | Moredun Research Institute,<br>Clone AV29                             | 1:100                        |
| Mouse IgG <sub>1</sub>                          | Monoclonal             | VPM21 (IgG <sub>1</sub> ), Institute of<br>Animal Health, Compton, UK | 1:100                        |
| Secondary<br>mouse-488                          | Polyclonal             | Abcam, Ab150117                                                       | 1:500                        |
| Secondary<br>rabbit-546                         | Polyclonal             | ThermoFisher Scientific,<br>A11010                                    | 1:500                        |
| Alexa Fluor™<br>488 Tyramide<br>SuperBoost™ Kit | N/A                    | ThermoFisher Scientific,<br>B40912                                    | N/A                          |

**Supplementary Table 3.** Conservation of tuft cell marker proteins in human, mouse and sheep

| Protein | Function             | Human        | Mouse        | Sheep        | % ID to Sheep (Human, Mouse) |
|---------|----------------------|--------------|--------------|--------------|------------------------------|
| POU2F3  | Transcription Factor | EAW67503     | XP_011240722 | XP_014956448 | 94, 92                       |
| GFI1B   | Transcription Factor | NP_001364233 | NP_031240    | XP_014949605 | 88, 84                       |
| DCLK-1  | Kinase               | NP_001182345 | NP_01104521  | XP_012039965 | 99, 98                       |
| TRPM5   | Cation channel       | EAX02514     | XP_017177873 | XP_027815546 | 83, 80                       |

**Supplementary Table 4.** Percentages of POU2F3<sup>+</sup> cells in total epithelium cells in naïve sheep (day 0) and at days 5, 10 and 21 following *T. circumcincta* infection.

| dpi | Animal number | Tuft cells as a % of epithelial cells in each image (x40 magnification) |        |        |        |        | Mean % of 5 Areas | Mean % | SD   | Median % |
|-----|---------------|-------------------------------------------------------------------------|--------|--------|--------|--------|-------------------|--------|------|----------|
|     |               | Area 1                                                                  | Area 2 | Area 3 | Area 4 | Area 5 |                   |        |      |          |
| 0   | U1P1          | 2.83                                                                    | 0      | 0.43   | 3.33   | 0.89   | 1.5               | 0.90   | 0.35 | 1.09     |
|     | U2P1          | 1.8                                                                     | 0      | 0      | 0.38   | 0.46   | 0.5               |        |      |          |
|     | U3P1          | 0                                                                       | 1.8    | 0      | 1.25   | 0.37   | 0.7               |        |      |          |
|     | U4P1          | 0.84                                                                    | 1.23   | 0.87   | 0.9    | 1.46   | 1.06              |        |      |          |
|     | U5P1          | 1.55                                                                    | 0      | 0      | 1.4    | 2.62   | 1.11              |        |      |          |
|     | U6P1          | 0.38                                                                    | 1.22   | 2.05   | 1.59   | 0.48   | 1.14              |        |      |          |
| 5   | 136B          | 0.46                                                                    | 1.42   | 1.83   | 0.99   | 5.4    | 2.02              | 1.46   | 0.37 | 1.39     |
|     | 034B          | 1.55                                                                    | 0.43   | 3.53   | 1.36   | 0.53   | 1.48              |        |      |          |
|     | 051B          | 0.62                                                                    | 2.58   | 1.04   | 1.15   | 1.11   | 1.3               |        |      |          |
|     | 084B          | 0.98                                                                    | 0.57   | 2.91   | 2.5    | 1.78   | 1.75              |        |      |          |
|     | 076B          | 2.73                                                                    | 1.94   | 0      | 0.57   | 0      | 1.04              |        |      |          |
|     | 107B          | 0.87                                                                    | 0.97   | 1.42   | 1.02   | 1.65   | 1.19              |        |      |          |
| 10  | 019B          | 2.58                                                                    | 2.38   | 3.04   | 4.61   | 4.86   | 3.49              | 4.71   | 2.10 | 4.20     |
|     | 004B          | 6.45                                                                    | 2.497  | 3.83   | 5.14   | 4.88   | 4.56              |        |      |          |
|     | 021B          | 0.43                                                                    | 0      | 3.14   | 4.03   | 11.64  | 3.85              |        |      |          |
|     | 090B          | 4.74                                                                    | 4.17   | 5.82   | 4.91   | 5.50   | 5.03              |        |      |          |
|     | 073B          | 1.78                                                                    | 6.75   | 0      | 2.88   | 1.89   | 2.66              |        |      |          |
|     | 067B          | 8.16                                                                    | 4.46   | 12.30  | 8.33   | 10.04  | 8.66              |        |      |          |
| 21  | 103B          | 4.33                                                                    | 7.11   | 2.51   | 6.39   | 1.58   | 4.38              | 7.08   | 3.43 | 6.20     |
|     | 072B          | 8.04                                                                    | 4.47   | 6.51   | 6.53   | 6.51   | 6.41              |        |      |          |
|     | 092B          | 14.92                                                                   | 8.26   | 6.25   | 7.06   | 14.24  | 10.14             |        |      |          |
|     | 060B          | 4.23                                                                    | 7.61   | 3.32   | 7.20   | 7.60   | 5.99              |        |      |          |
|     | 105B          | 4.37                                                                    | 0.52   | 3.68   | 5.11   | 2.92   | 3.32              |        |      |          |
|     | 049B          | 12.45                                                                   | 20.43  | 7.43   | 12.13  | 8.63   | 12.21             |        |      |          |

dpi = day post-infection; SD = standard deviation of mean



**Supplementary Table 6.** Marker genes used to identify ovine abomasum cell clusters, based on enriched expression across clusters (Supplementary Table 5) and published data (9,31,32)

| Cluster | Putative cell type | Marker Genes                                                     |
|---------|--------------------|------------------------------------------------------------------|
| 0       | Parietal           | ATP4, AQP4, KCNQ1, AGR2, LYZ1.1, LYZ2, TFF1, TFF2, S100A5        |
| 1       | CD8 T cell         | CD3E, CD7, CD8A, CCL4, CCL5, GZMA, GZMB.1                        |
| 2       | CD4 T cell         | CD4, CTLA4, CD52, CXCR4, IL2RA, LAG3                             |
| 3       | Macrophage         | CD68, CD74, CXCL3, C1QC, C1QA, CTSZ, CTSS, CTSC, BOLA-DRA        |
| 4       | Pre-B cell         | Jchain, VPREB1, VPREB3, MZB1                                     |
| 5       | Mucous             | MUC1, MUC20, MUC13, SYTL2, KLF4                                  |
| 6       | Neutrophil         | S100A12, S100A8, S100A9, CSF3R, GPR84, NCF1                      |
| 7       | CD8 T cell         | CD3E, CD8, STMN1                                                 |
| 8       | DC                 | BOLA-DRA/DQB, CD74, CD83, CXCL9, CST3                            |
| 9       | B cell             | CD83, CD79B, CD19, CD74, CD40, CXCR4, CXCR5, MS4A1 (CD20), BANK1 |
| 10      | Granulocyte        | CD24, ATP4, ATP5, IL20RA                                         |
| 11      | Basophil           | CCL3, CCL2, GATA2, TPSB2, IL4, FcER1A, ANG2                      |
| 12      | Tuft               | IL17RB, KRT23, LTC4S, PTGS1, ALOX5, LRMP, GRASP, AVIL, CD24      |
| 13      | ECL                | CHGA, HDC, SST, GHRL                                             |
| 14      | Endothelial        | C3, CD99, DCN                                                    |

**Supplementary Table 7.** Number and percentage of cells in each cluster from integrated scRNA-seq data

| <b>Cluster</b> | <b>Cell count</b> | <b>Percentage of total count</b> |
|----------------|-------------------|----------------------------------|
| Parietal       | 3730              | 22.08                            |
| CD8 T cell     | 2809              | 16.63                            |
| CD4 T cell     | 2277              | 13.48                            |
| Macrophage     | 1950              | 11.54                            |
| Pre-B cell     | 1452              | 8.60                             |
| Mucous         | 1271              | 7.52                             |
| Neutrophil     | 914               | 5.41                             |
| CD8 T cell     | 741               | 4.39                             |
| DC             | 572               | 3.39                             |
| B cell         | 394               | 2.33                             |
| Granulocyte    | 267               | 1.58                             |
| Basophil       | 246               | 1.46                             |
| Tuft           | 189               | 1.12                             |
| ECL            | 52                | 0.31                             |
| Endothelial    | 27                | 0.16                             |

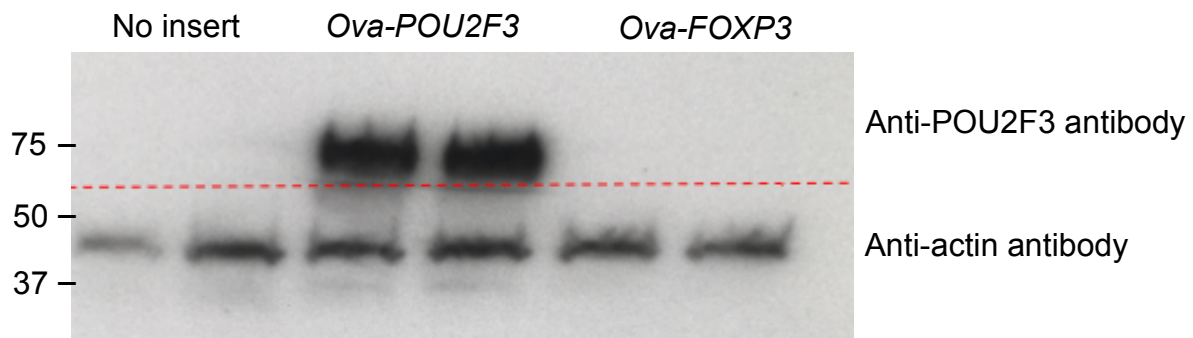

**Supplementary Figure 1. Western blot showing specificity of anti-POU2F3 antibody to ovine POU2F3 protein.** Cell lysates from HEK cells transfected with pCI-neo vector containing no insert sequence, *Ova-POU2F3*, or unrelated *Ova-FOXP3* gene were probed with anti-POU2F3 or anti-actin antibody and signal detected using chemiluminescent substrate. Duplicate samples were probed for each lysate.

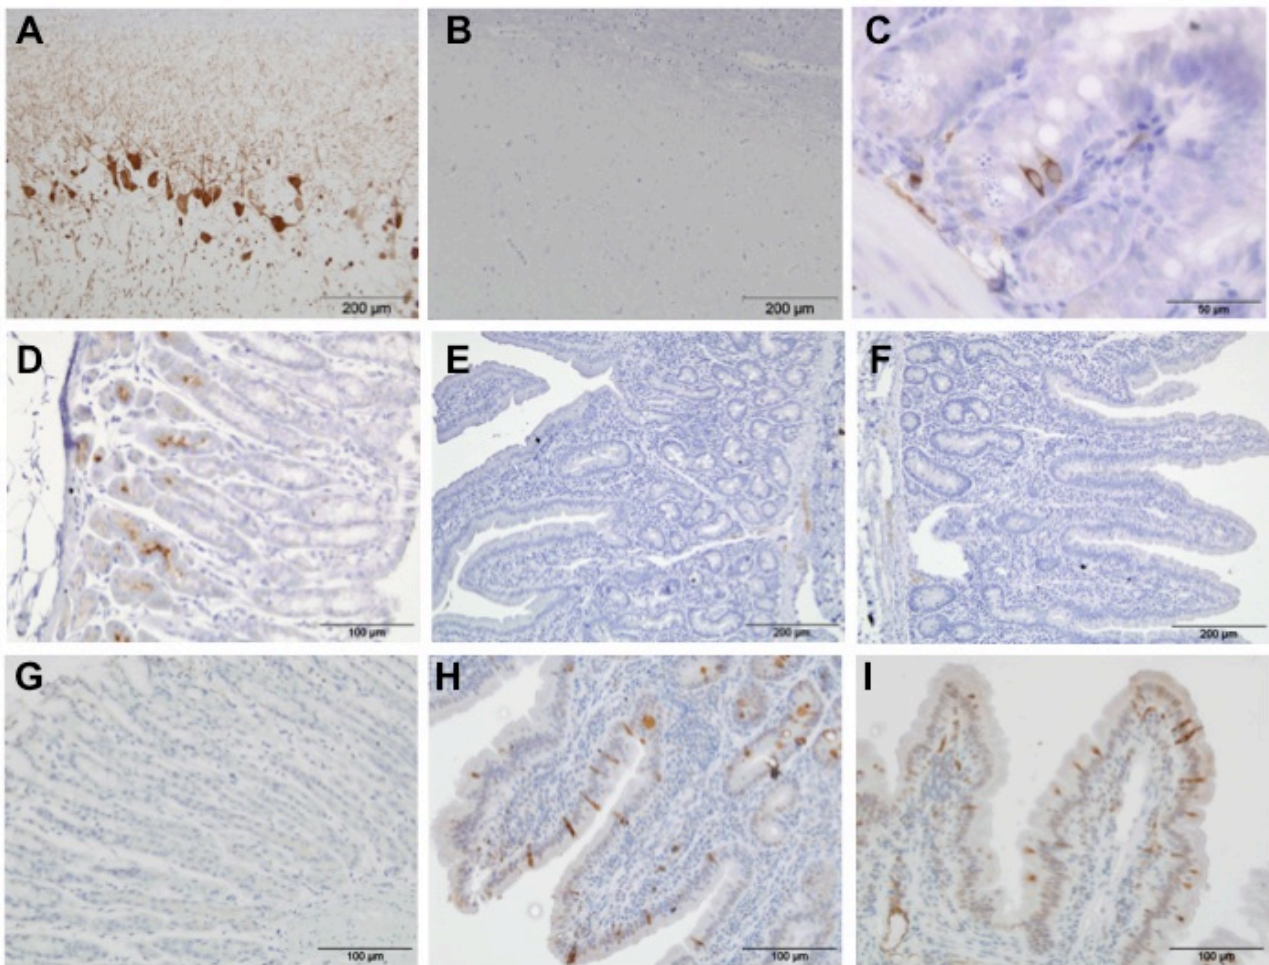

**Supplementary Figure 2. DCLK-1 and TRPM-5 antibody labelling.** (A) DCLK-1<sup>+</sup> cells (brown) were identified in ovine neuronal cells while (B) IgG isotype control was negative. DCLK-1 antibody identified putative tuft cells in murine SI tissue (C) while non-specific or no labelling was observed in ovine abomasum (D), duodenum (E) and jejunum (F). TRPM-5 antibody does not show labelling in ovine abomasum tissue (G), but localizes to putative tuft cells in the ovine duodenum (H) and jejunum (I).

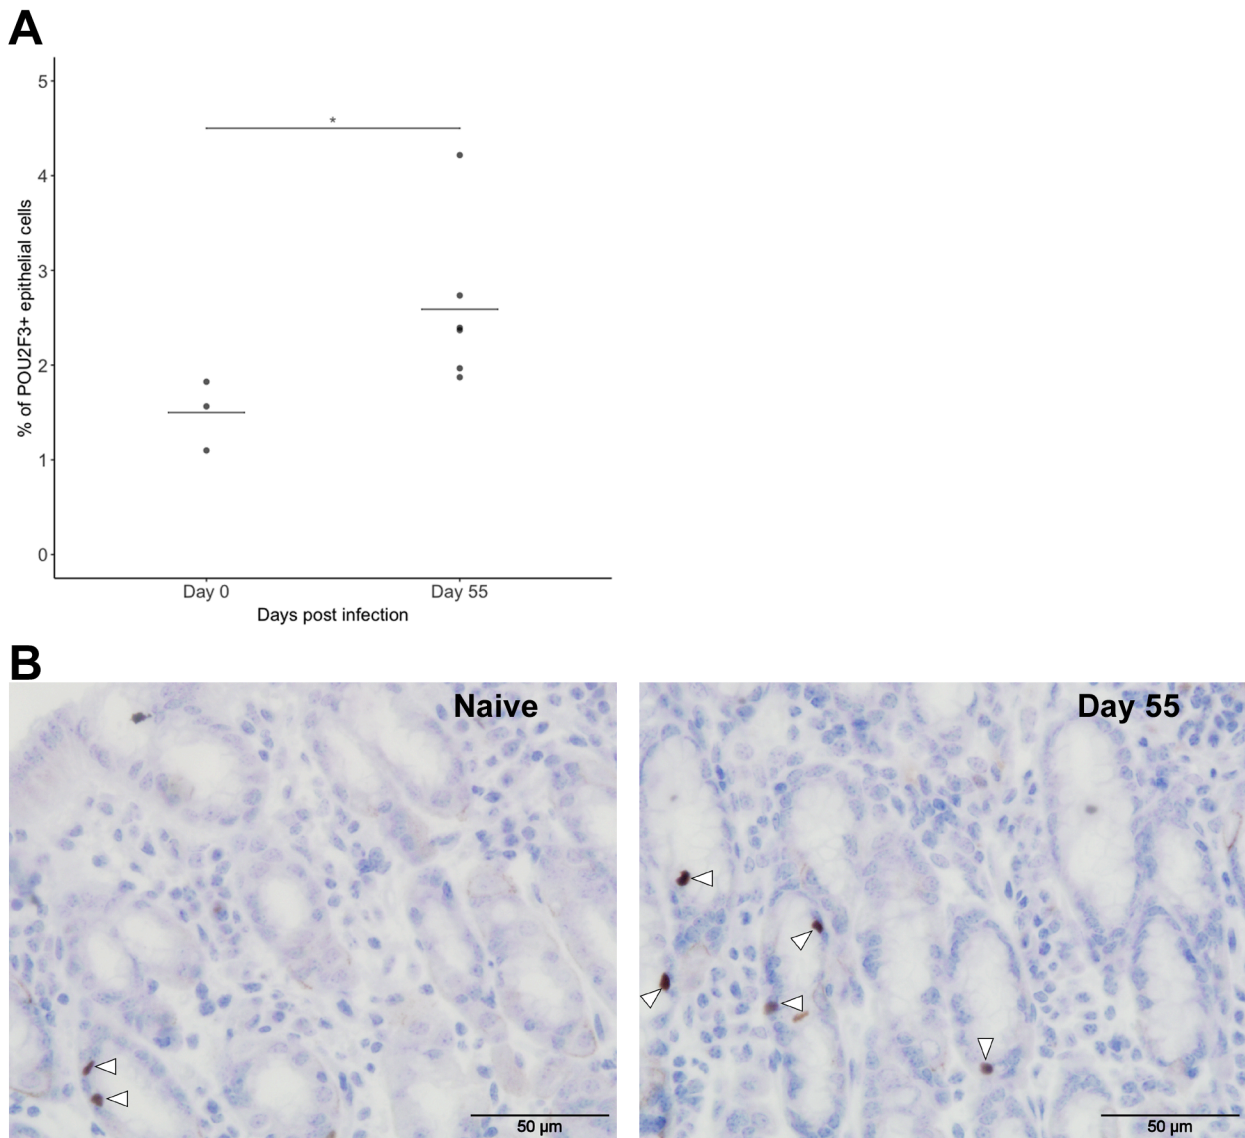

**Supplementary Figure 3. Increase in abomasal tuft cell following *Haemonchus contortus* infection.** **(A)** Percentage of POU2F3<sup>+</sup> cells in abomasal epithelium in naïve sheep and at day 55 following infection with *H. contortus*. The percentage from five tissue sections was calculated from three naïve (day 0) and six infected (day 55) animals ( $P < 0.05$  using a two-sample t-test). Horizontal lines indicate mean value. **(B)** Representative images of POU2F3<sup>+</sup> cells (brown) in the ovine abomasum epithelium from naïve sheep and at day 55 after *H. contortus* infection. White arrowheads indicate POU2F3<sup>+</sup> cells.

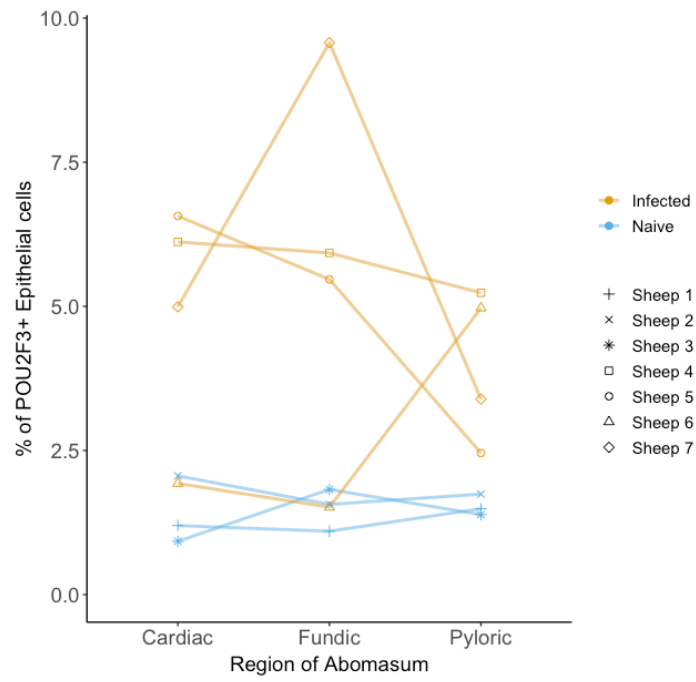

**Supplementary Figure 4. Presence of tuft cells in different regions of ovine abomasum (cardiac, fundic, pyloric).** Percentage of POU2F3<sup>+</sup> cells detected by immunohistochemistry across the three regions in naive sheep (n=3) and following infection with *Teladorsagia circumcincta* (n=4).

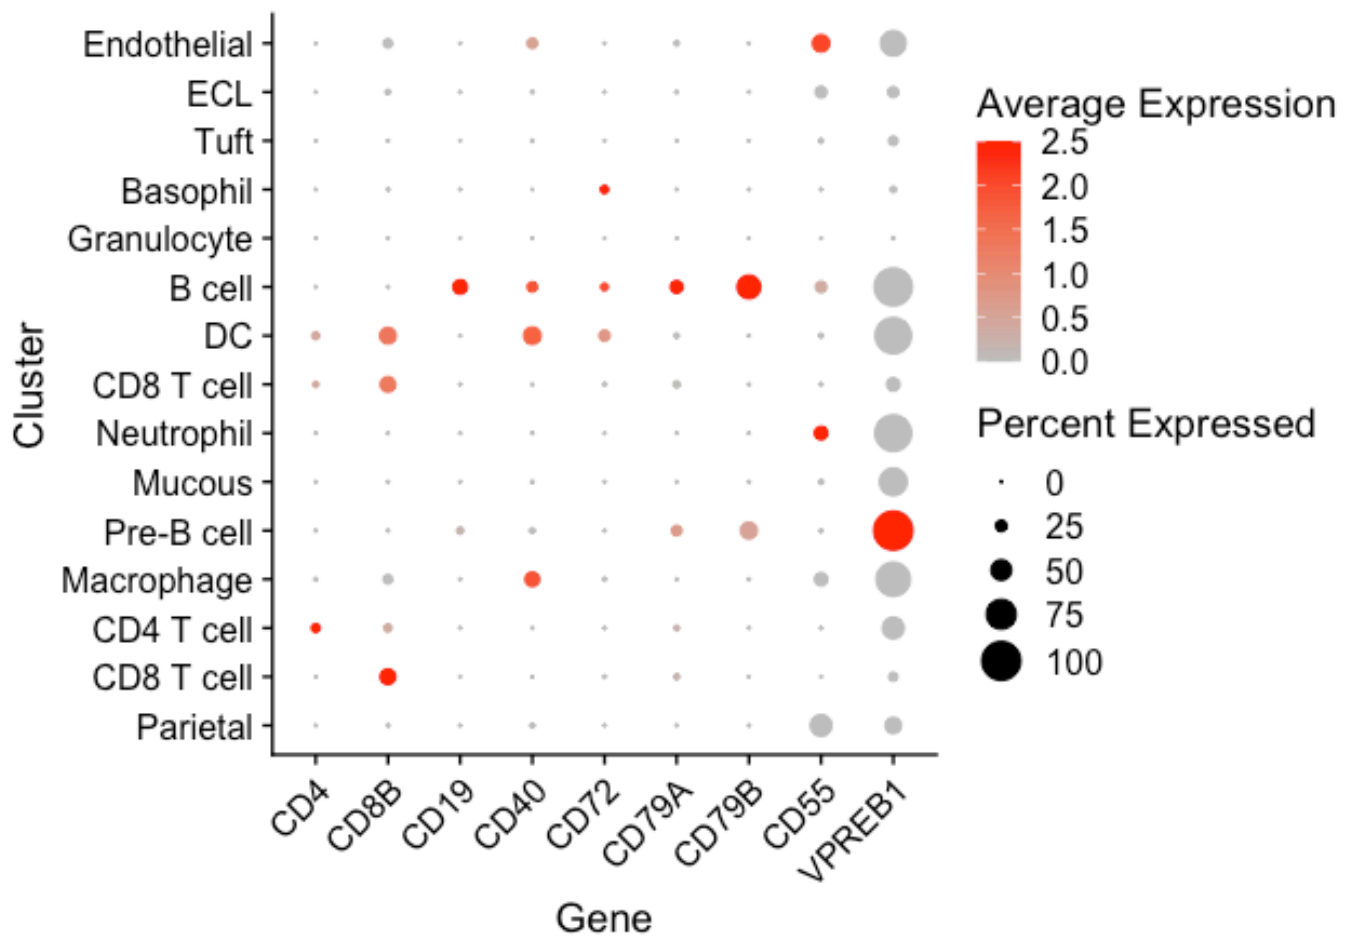

**Supplementary Figure 5. Dot plot showing log-normalised expression values of immune cell marker genes across all cell clusters.** Marker gene lists for each cell cluster are available in Supplementary Table 5.

## Sub-cluster 1

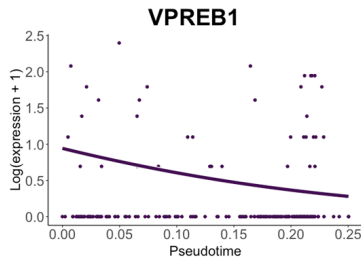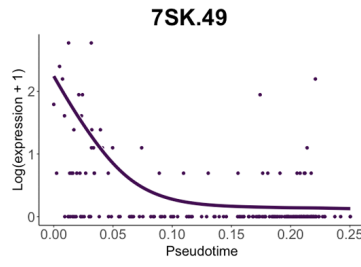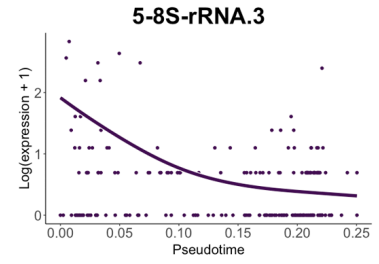

## Sub-cluster 2

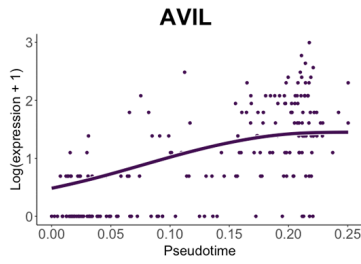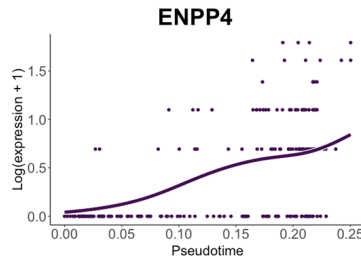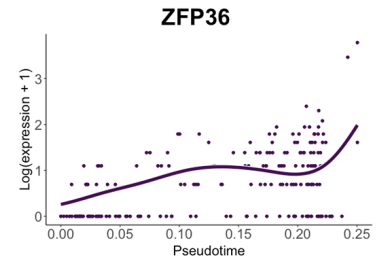

## Sub-cluster 3

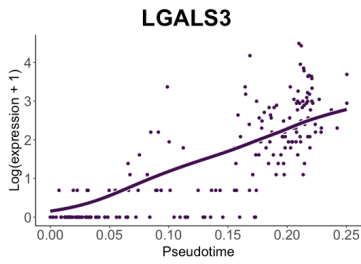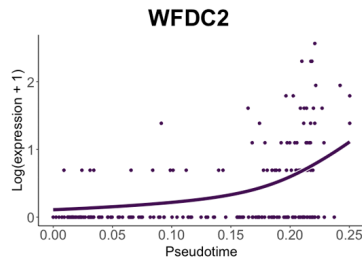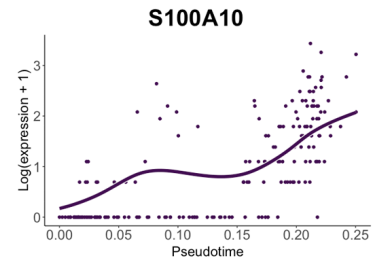

**Supplementary Figure 6. Gene expression across pseudotime for three selected genes upregulated in each of the three tuft cell sub-clusters.** Marker gene lists for tuft cell sub-clusters 1, 2 and 3 are available in Supplementary Table 8.



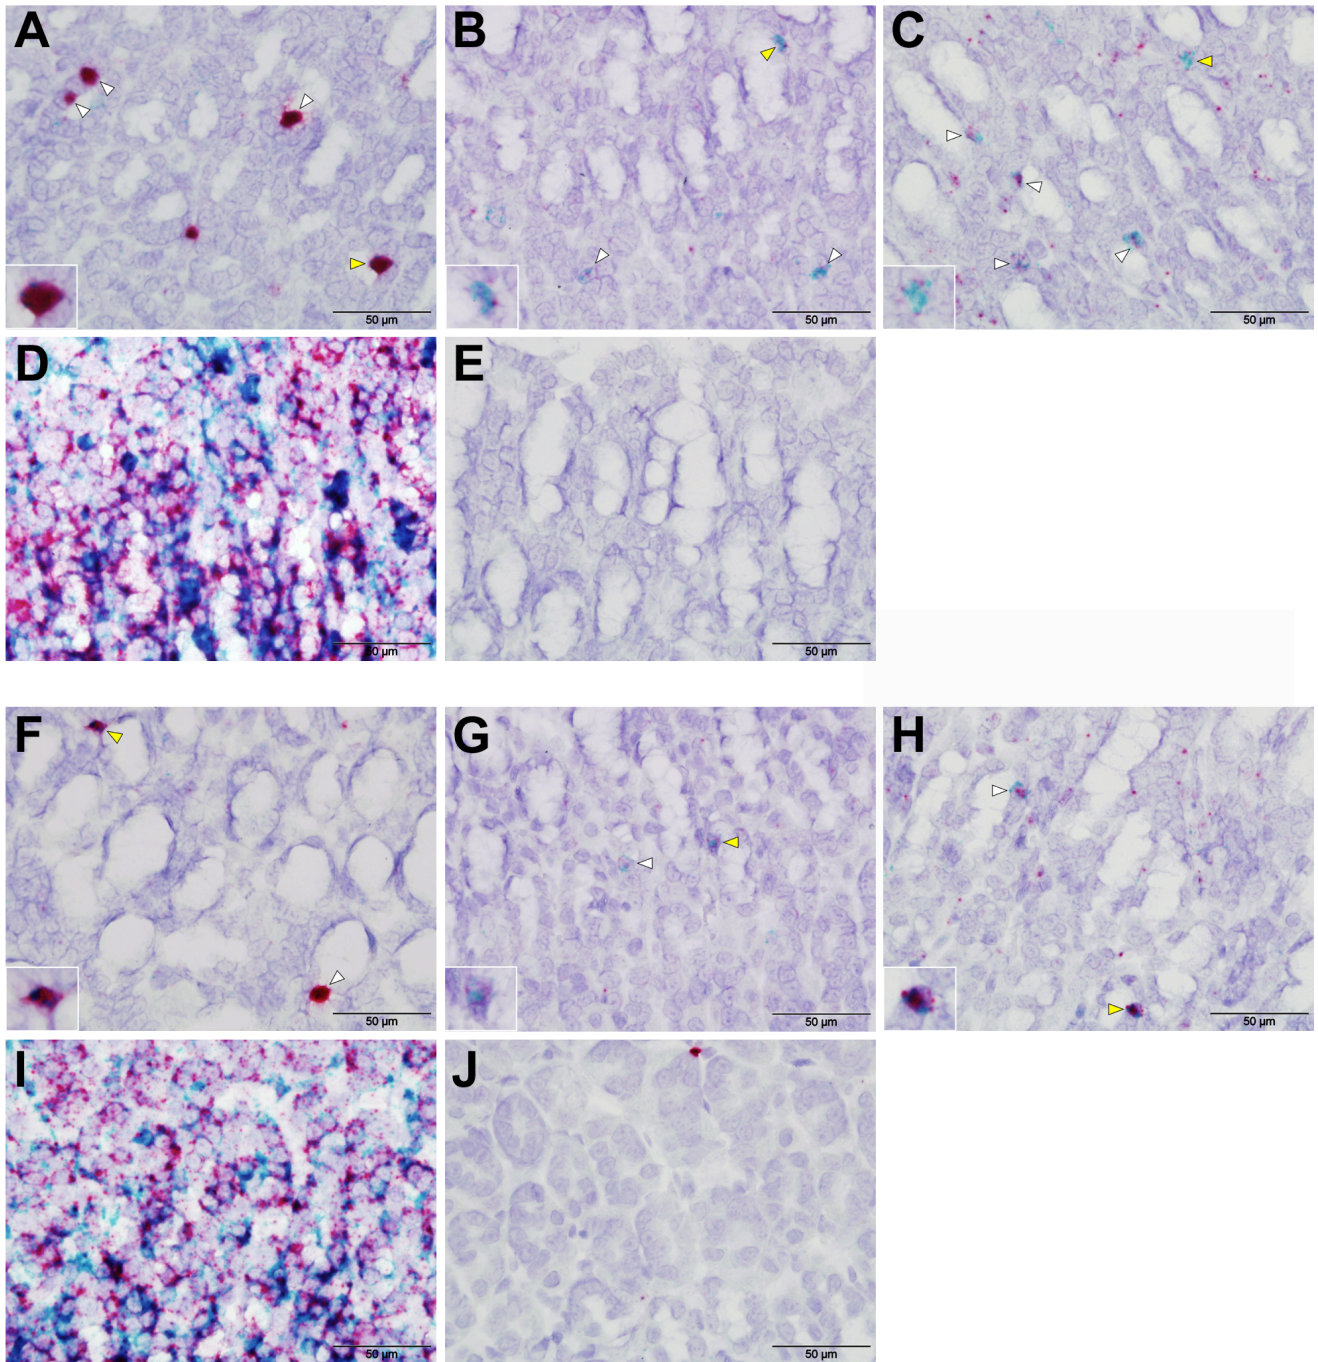

**Supplementary Figure 7.** RNAscope of ovine tuft cell gene expression. Co-expression of probes to *POU2F3* (green) and (A, F) *IL-17RB* (B, G) *TAS2R16* (C, H) *DCLK-2* (all red) in ovine abomasal tissue from two control (non-infected) sheep (numbers 12633 and 12660). This shows fewer tuft cells, but similar co-localisation of *POU2F3* with other tuft-cell genes as seen in abomasal tissue from *H. contortus* infected sheep (Figure 7). Arrowheads show probe co-localisation, with yellow arrows indicating the cells represented in the insets. (D, I) Signal from positive control probes to ovine beta actin (*actb*, green) and ovine peptidylprolyl isomerase (*ppib*, red). (E, J) No labelling with negative control probe *DapB* from *Bacillus subtilis*. Panels (A-F) represent tissue from sheep 12633; panels (G-J) represent tissue from sheep 12660.
